# Supplementary material
Source: Springer Nature journal article supplement (https://www.springermedizin.de/resource/supplementary/13002_2010_204_MOESM2_ESM.pdf/9627384)

**Number**

10  
9  
8  
7  
6  
5  
4  
3  
2  
1  
0

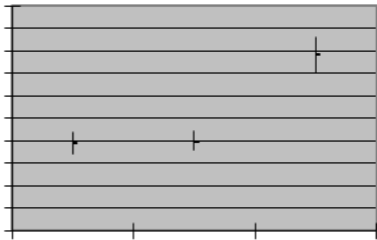

**Male**

**Female**

**Total**

**Sex**

Supplement: MOESM2 [file 9627384]
